# Supplementary material for: Organophosphate and carbamate insecticide exposure is related to lung function change among smallholder farmers: a prospective study
Source: HighWire-hosted journal article supplement (doi:10.1136/thoraxjnl-2020-214609), 2021-01-21
Supplement: thoraxjnl-2020-214609supp003_data_supplement.pdf [file thoraxjnl-2020-214609supp003_data_supplement.pdf]

### Online appendix 3: Analysis of variance for exposure and outcome variables

| Parameter                     | $\sigma^2_{\text{Tot}}$ | $\sigma^2_{\text{BF}}$ | $\sigma^2_{\text{BP}}$ | $\sigma^2_{\text{WP}}$ | $(\sigma^2_{\text{WP}})/(\sigma^2_{\text{BF}} + \sigma^2_{\text{BP}})$ |
|-------------------------------|-------------------------|------------------------|------------------------|------------------------|------------------------------------------------------------------------|
| FEV <sub>1</sub> [L]          | 0.410                   | 0.134                  | 0.261                  | 0.015                  | 0.037                                                                  |
| FVC [L]                       | 0.596                   | 0.178                  | 0.394                  | 0.025                  | 0.043                                                                  |
| FEV <sub>1</sub> /FVC         | 0.005                   | 0.000                  | 0.003                  | 0.001                  | 0.336                                                                  |
| PEF [L/s]                     | 2.728                   | 0.871                  | 1.500                  | 0.357                  | 0.151                                                                  |
| FEF <sub>25</sub> [L/s]       | 2.246                   | 0.675                  | 1.133                  | 0.439                  | 0.243                                                                  |
| FEF <sub>50</sub> [L/s]       | 1.167                   | 0.371                  | 0.610                  | 0.186                  | 0.190                                                                  |
| log(FEF <sub>75</sub> [L/s])  | 0.235                   | 0.069                  | 0.116                  | 0.051                  | 0.273                                                                  |
| FEF <sub>25-75</sub> [L/s]    | 0.863                   | 0.255                  | 0.485                  | 0.123                  | 0.166                                                                  |
| FEV <sub>1</sub> Z-score      | 0.985                   | 0.179                  | 0.702                  | 0.105                  | 0.119                                                                  |
| FVC Z-score                   | 1.019                   | 0.078                  | 0.807                  | 0.134                  | 0.152                                                                  |
| FEV <sub>1</sub> /FVC Z-score | 1.051                   | 0.113                  | 0.620                  | 0.317                  | 0.432                                                                  |
| FEF <sub>25-75</sub> Z-score  | 0.758                   | 0.211                  | 0.396                  | 0.151                  | 0.249                                                                  |
| AChE [U/mL]                   | 0.307                   | 0.018                  | 0.219                  | 0.070                  | 0.295                                                                  |
| Hb [g/dL]                     | 1.917                   | 0.433                  | 0.853                  | 0.631                  | 0.490                                                                  |
| AChE/Hb [U/g]                 | 15.818                  | 0.000                  | 12.923                 | 2.894                  | 0.224                                                                  |

For FEF<sub>75</sub>, variance have been calculated on the log scale, as the variable was lognormal.

#### Legend

- $\sigma^2_{\text{Tot}}$  = total variance
- $\sigma^2_{\text{BF}}$  = between-family variance
- $\sigma^2_{\text{BP}}$  = between-person variance
- $\sigma^2_{\text{WP}}$  = within-person variance
- $(\sigma^2_{\text{WP}})/(\sigma^2_{\text{BF}} + \sigma^2_{\text{BP}})$  = ratio between within-person variance and the sum of the between-family and between-person variances.
